# Supplementary material
Source: publisher figshare collection journal article supplement (https://acs.figshare.com/ndownloader/files/14490407)
Supplement: Supplementary file 1 [file 14490407]

## **Supporting Information**

### **Amorphous Mesoporous Magnesium Carbonate (MMC) as a functional support for UV blocking semiconductor nanoparticles for cosmetic applications**

Michelle Åhlén, Ocean Cheung\* and Maria Strømme\*

Division of Nanotechnology and Functional Materials, Department of Engineering Sciences, Uppsala University, SE-751 21, Uppsala,

Sweden

## EXPERIMENTAL

### MATERIALS

Talcum USP grade median particle size 5.5  $\mu\text{m}$  Making Cosmetics, Potato starch food grade

Garant, Magnesium hydroxide BioUltra  $\geq 99.0\%$  (KT) Sigma-Aldrich.

All chemicals were used as bought without further purification.

### RESULTS AND DISCUSSION

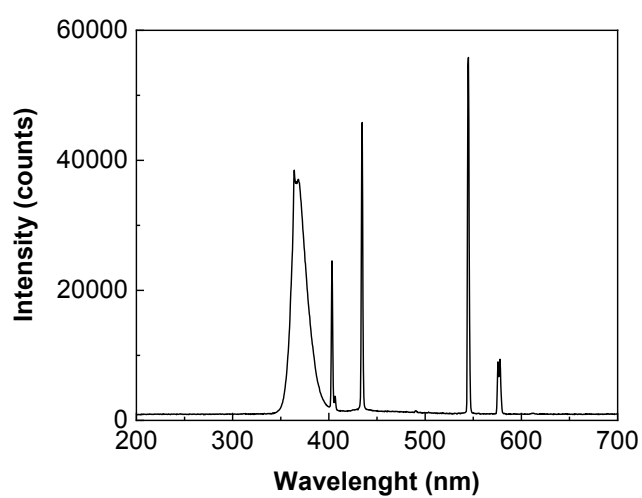

**Figure S1.** Emission spectrum of four UV-9W-L G23 type fluorescence tubes used for photocatalysis experiment.

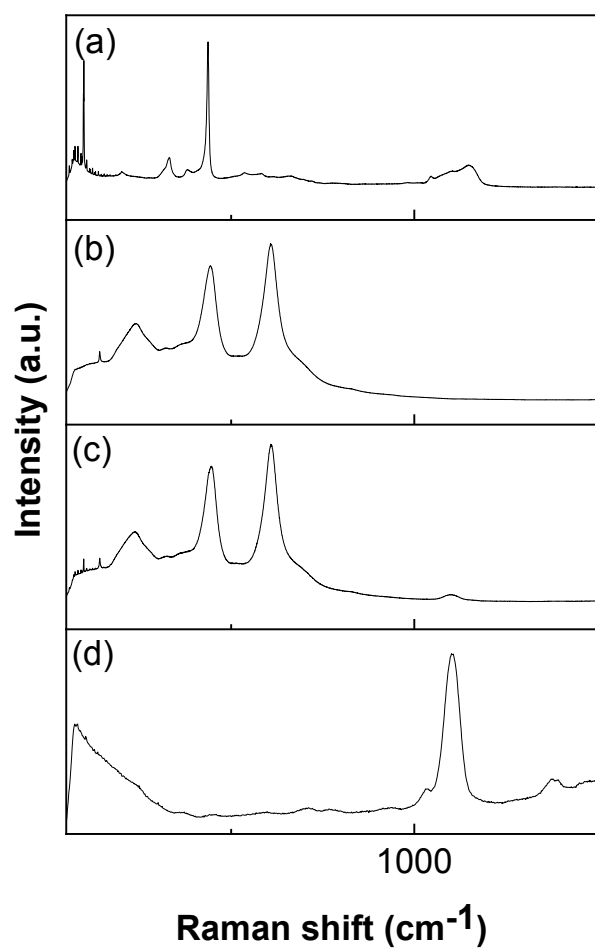

**Figure S2.** Raman spectra of (a) ZnO (wurtzite) nanoparticles, (b) TiO<sub>2</sub> (rutile) nanoparticles, (c) MMC-TiO<sub>2</sub>-ZnO and (d) MMC.

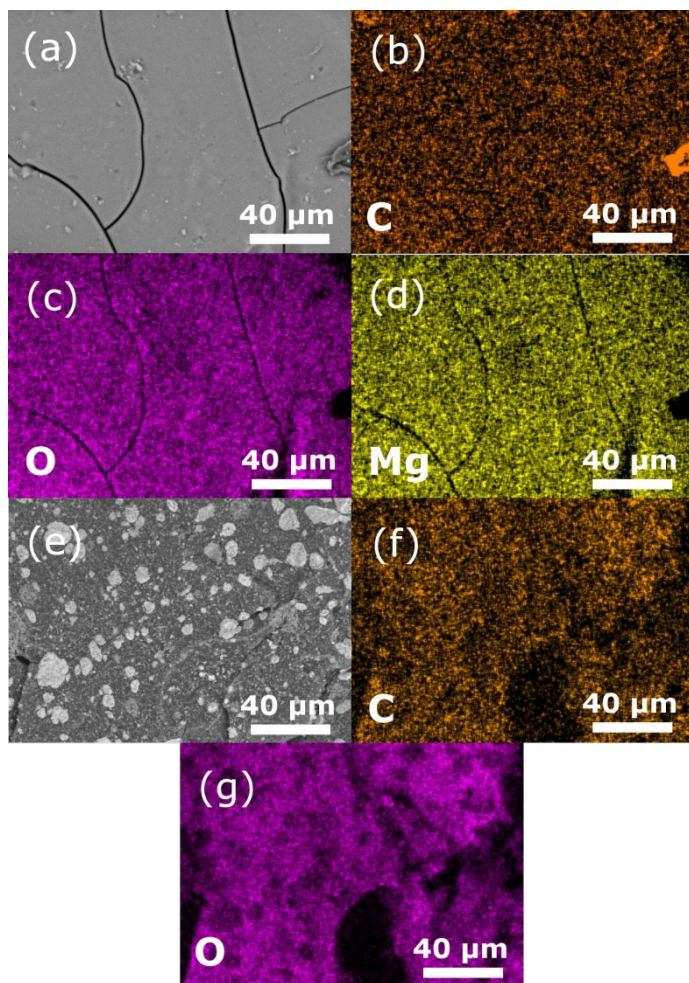

**Figure S3.** SEM-EDX maps of (a-d) MMC and (e-g) MMC-TiO<sub>2</sub>-ZnO on the elements carbon, oxygen and magnesium.

**Table S1.** Estimated elemental analysis of MMC and MMC-TiO<sub>2</sub>-ZnO obtained from SEM-EDX mappings of the areas shown in Figure S4.

| Element   | MMC (at. %) | MMC-TiO <sub>2</sub> -ZnO (at. %) |
|-----------|-------------|-----------------------------------|
| Oxygen    | 64.6 ± 8.0  | 60.9 ± 5.6                        |
| Carbon    | 18.7 ± 2.0  | 17.5 ± 1.4                        |
| Magnesium | 16.8 ± 1.6  | 13.5 ± 1.0                        |
| Titanium  | —           | 4.1 ± 0.3                         |
| Zinc      | —           | 4.0 ± 0.5                         |

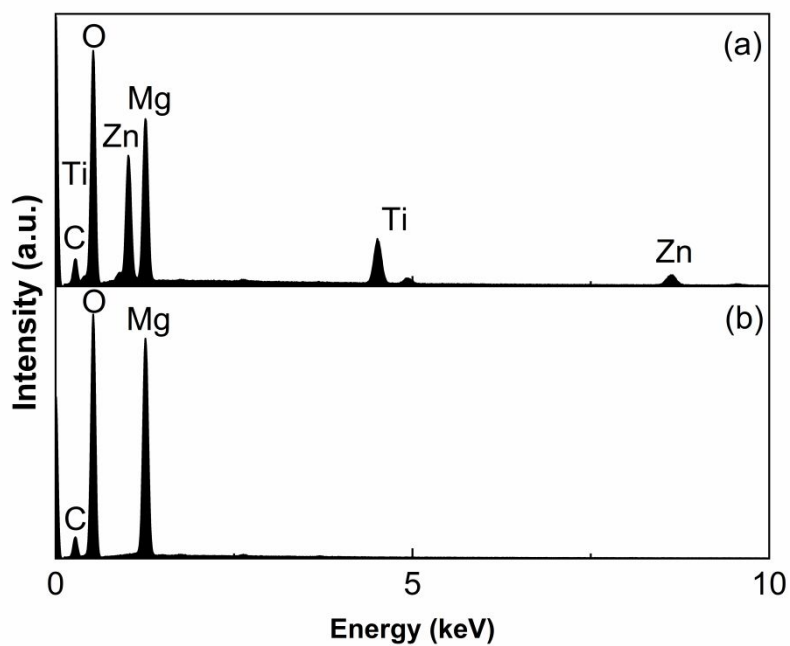

**Figure S4.** SEM-EDX spectra of (a) MMC-TiO<sub>2</sub>-ZnO and (b) MMC.

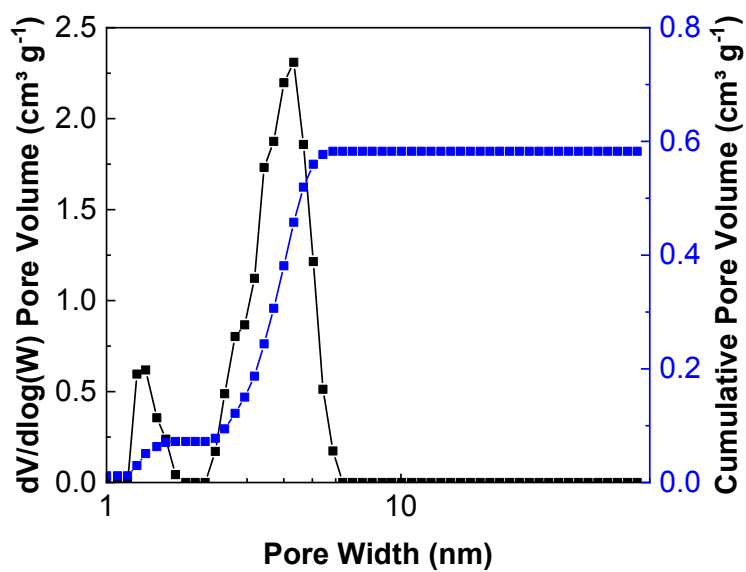

**Figure S5.** Differential pore volume distribution (■) and cumulative pore volume (●) of MMC.

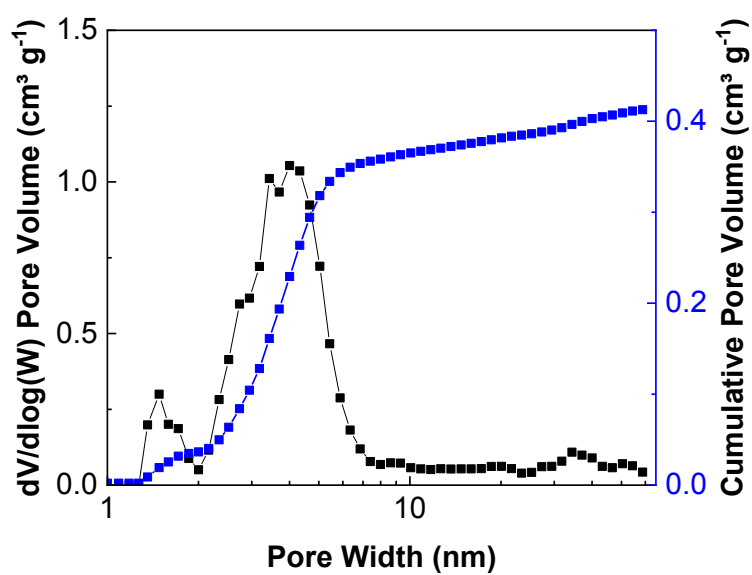

**Figure S6.** Differential pore volume distribution (■) and cumulative pore volume (●) of MMC-TiO<sub>2</sub>-ZnO.

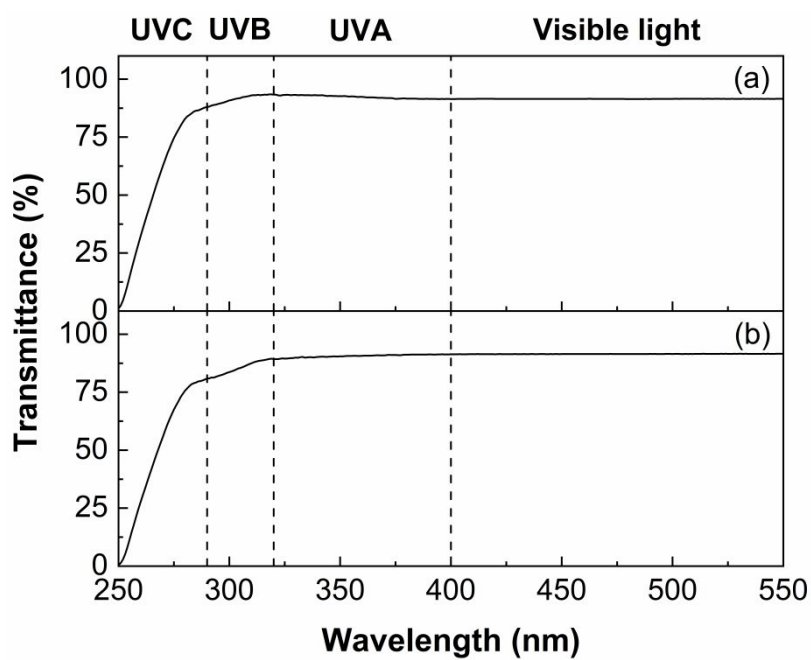

**Figure S7.** UV-transmittance of (a) a PDMS covered PMMA plate and (b) a PMMA plate.

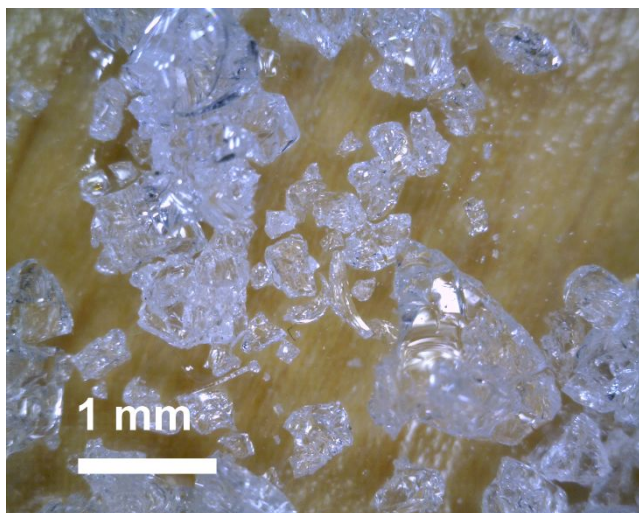

**Figure S8.** Light microscopy image of MMC particles.

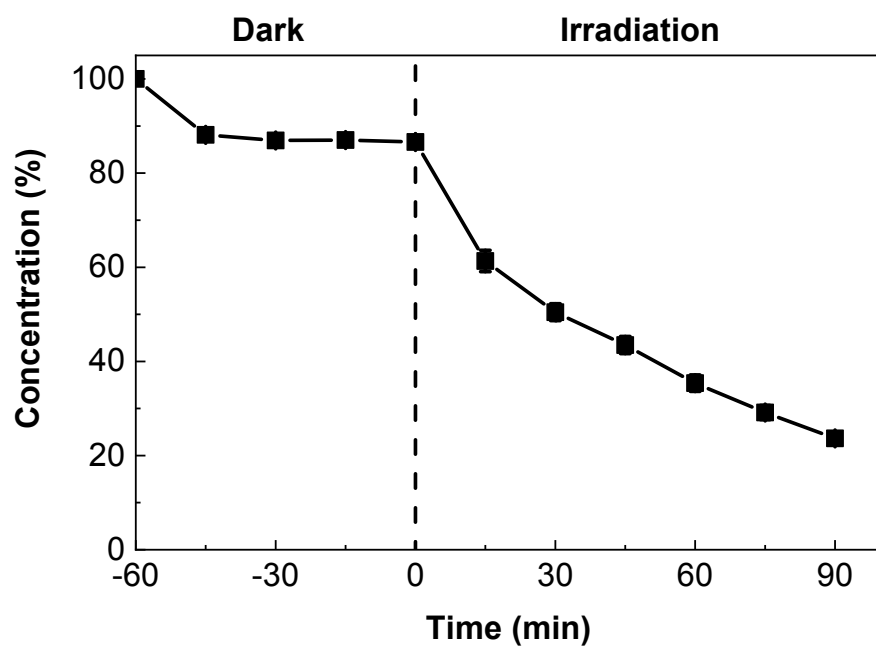

**Figure S9.** The effect of talc mixed with  $\text{TiO}_2$  (rutile) and ZnO nanoparticles on the adsorption and photocatalytic degradation of the anionic azo dye amaranth. The mixture contained an equal amount of  $\text{TiO}_2/\text{ZnO}$  as MMC- $\text{TiO}_2$ -ZnO and the measurements were performed in triplicates.

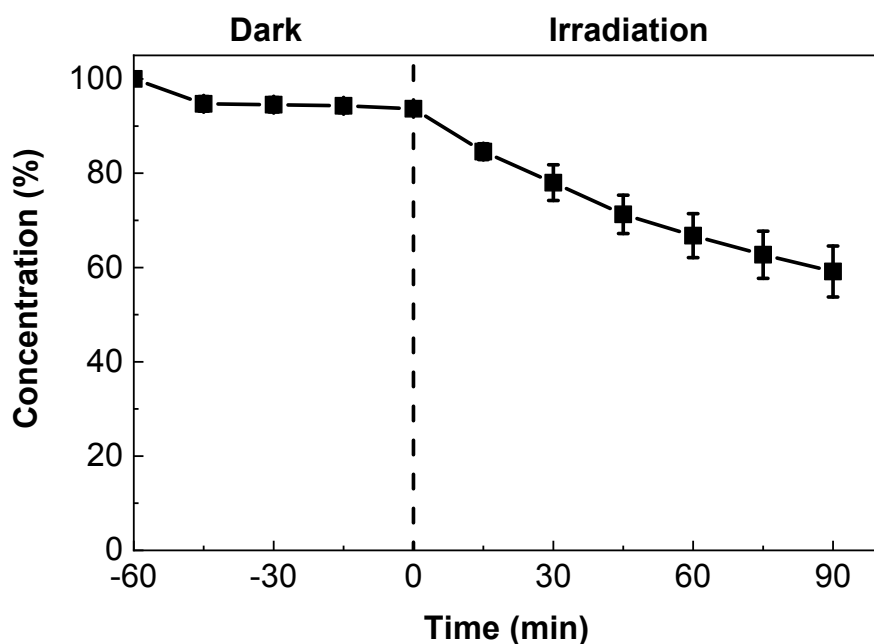

**Figure S10.** The effect of starch mixed with TiO<sub>2</sub> (rutile) and ZnO nanoparticles on the adsorption and photocatalytic degradation of the anionic azo dye amaranth. The mixture contained an equal amount of TiO<sub>2</sub>/ZnO as MMC-TiO<sub>2</sub>-ZnO and the measurements were performed in triplicates.

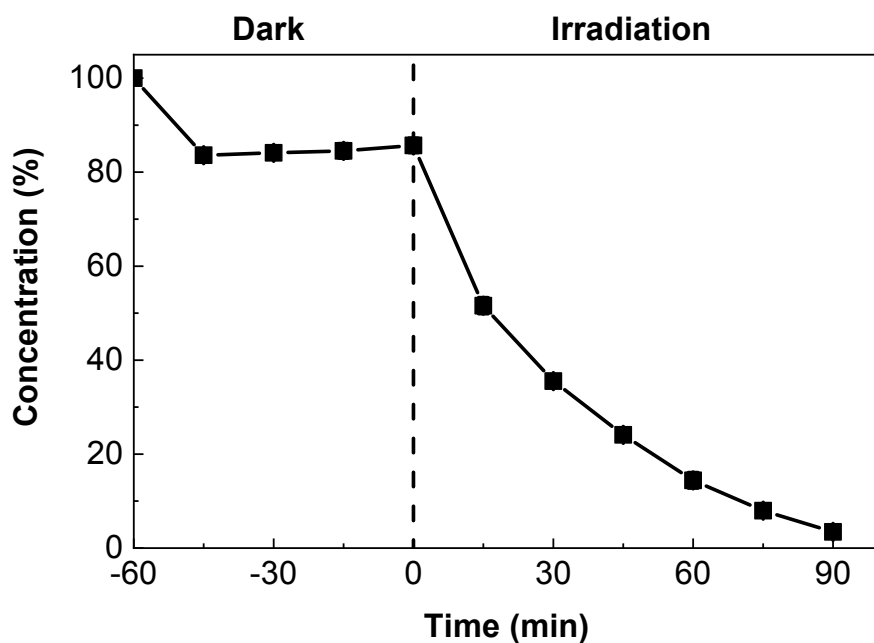

**Figure S11.** The effect of Mg(OH)<sub>2</sub> mixed with TiO<sub>2</sub> and ZnO nanoparticles on the adsorption and photocatalytic degradation of the anionic azo dye amaranth. The mixture contained an equal amount of TiO<sub>2</sub>/ZnO as MMC-TiO<sub>2</sub>-ZnO and the measurements were performed in triplicates.



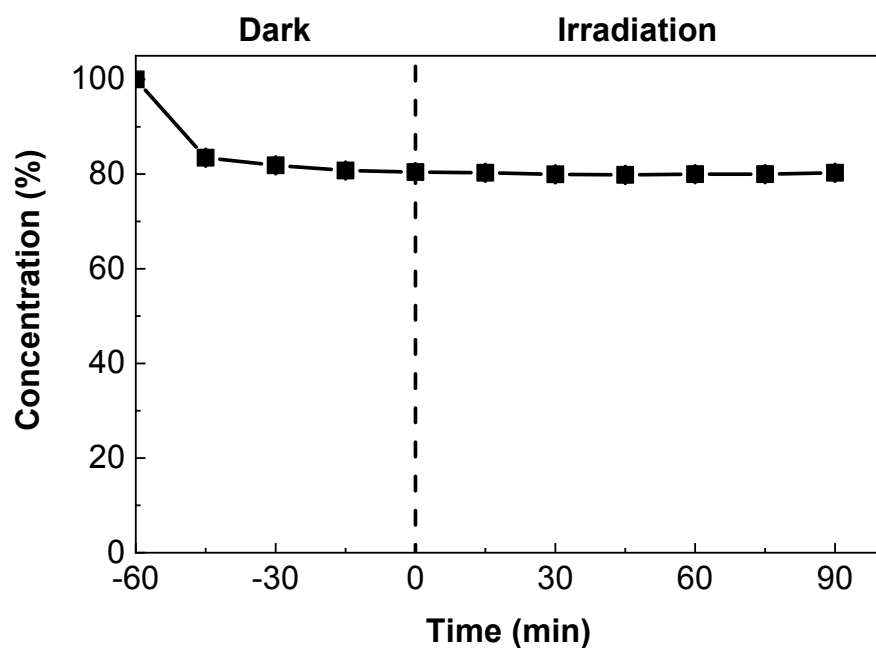

**Figure S12.** The effect of  $\text{MgCO}_3$  on the adsorption and photocatalytic degradation of the anionic azo dye amaranth. The measurements were performed in triplicates.

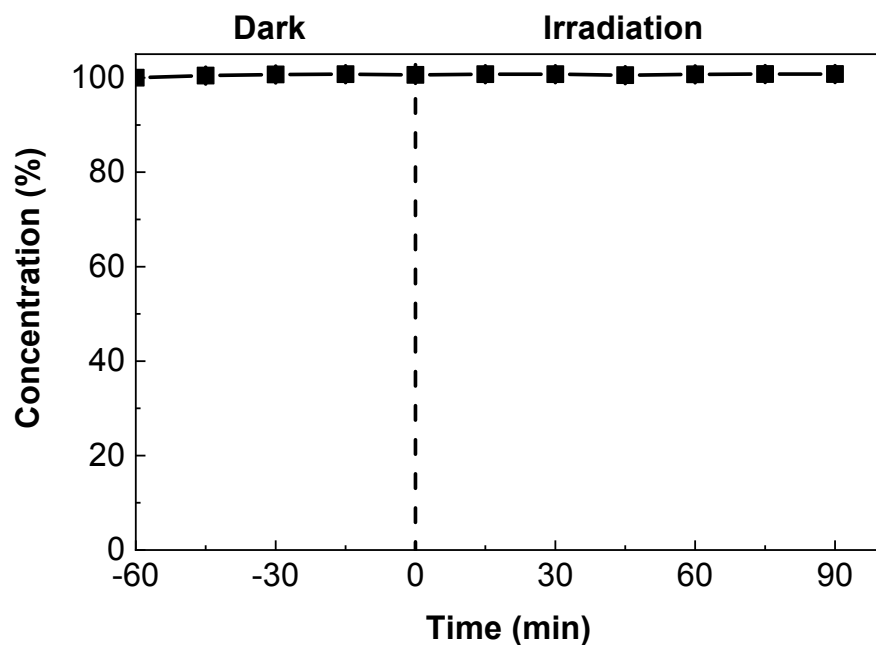

**Figure S13.** The effect of starch on the adsorption and photocatalytic degradation of the anionic azo dye amaranth. The measurements were performed in triplicates.

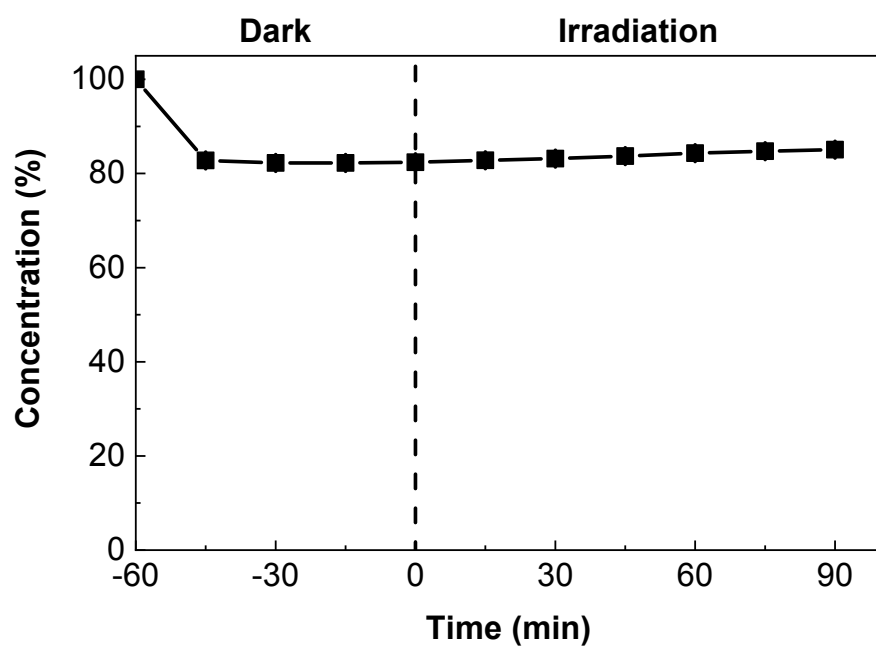

**Figure S14.** The effect of  $\text{Mg}(\text{OH})_2$  on the adsorption and photocatalytic degradation of the anionic azo dye amaranth. The measurements were performed in triplicates.

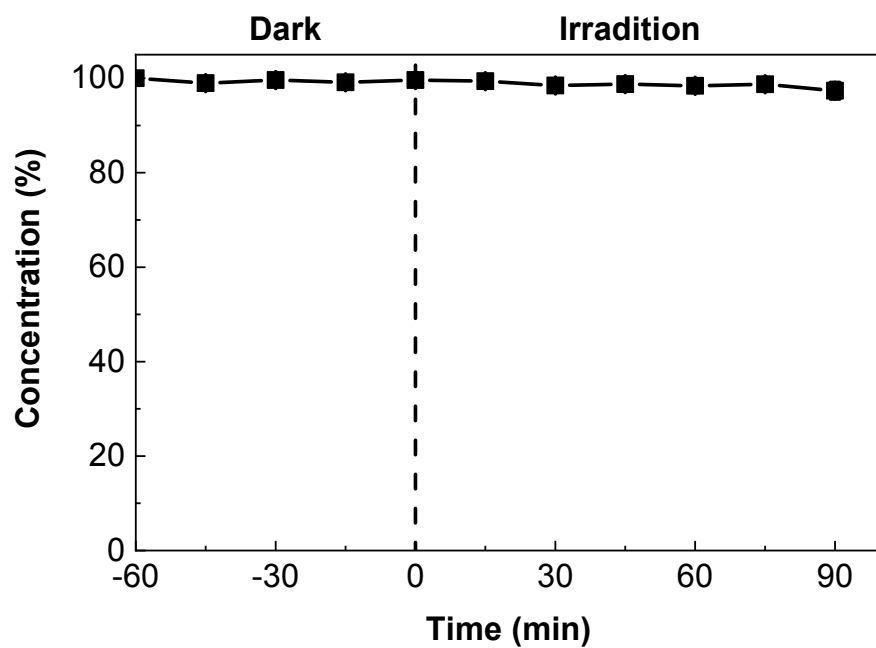

**Figure S15.** The effect of talc on the adsorption and photocatalytic degradation of the anionic azo dye amaranth. The measurements were performed in triplicates.
